# Supplementary material for: Liquid-Modulated Photothermal Phenomena in Porous Silicon Nanostructures Studied by μ-Raman Spectroscopy
Source: Nanomaterials (Basel). 2023 Jan 11;13(2):310. doi: 10.3390/nano13020310 (PMC9867246; doi:10.3390/nano13020310)
Supplement: Supplementary file 1 [file nanomaterials-13-00310-s001.zip › nanomaterials-2132358-supplementary.pdf]

# Liquid-Modulated Photothermal Phenomena in Porous Silicon Nanostructures Studied by $\mu$ -Raman Spectroscopy

Oksana Makukha <sup>1</sup>, Ivan Lysenko <sup>2</sup> and Ali Belarouci <sup>1,\*</sup>

<sup>1</sup> Lyon Institute of Nanotechnology, UMR 5270, INSA de Lyon, 69100 Villeurbanne, France

<sup>2</sup> Physics Department, Taras Shevchenko National University of Kyiv, 01033 Kyiv, Ukraine

\* Correspondence: ali.belarouci@ec-lyon.fr

## 1. Thicknesses of porous Si layers

Thicknesses of porous Si layers were estimated by SEM. A typical cross sectional image of porous Si sample is presented in Figure S1.

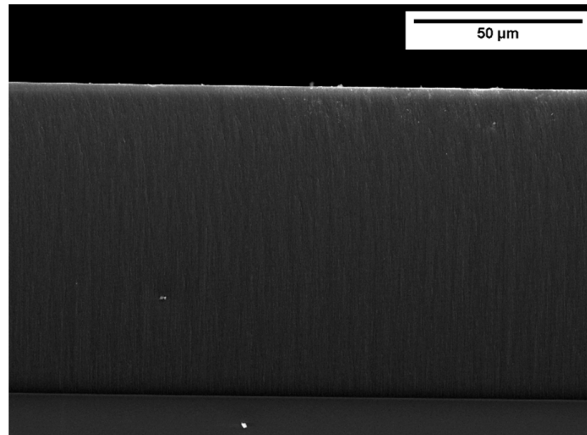

**Figure S1.** Cross-sectional SEM image of porous Si layer.

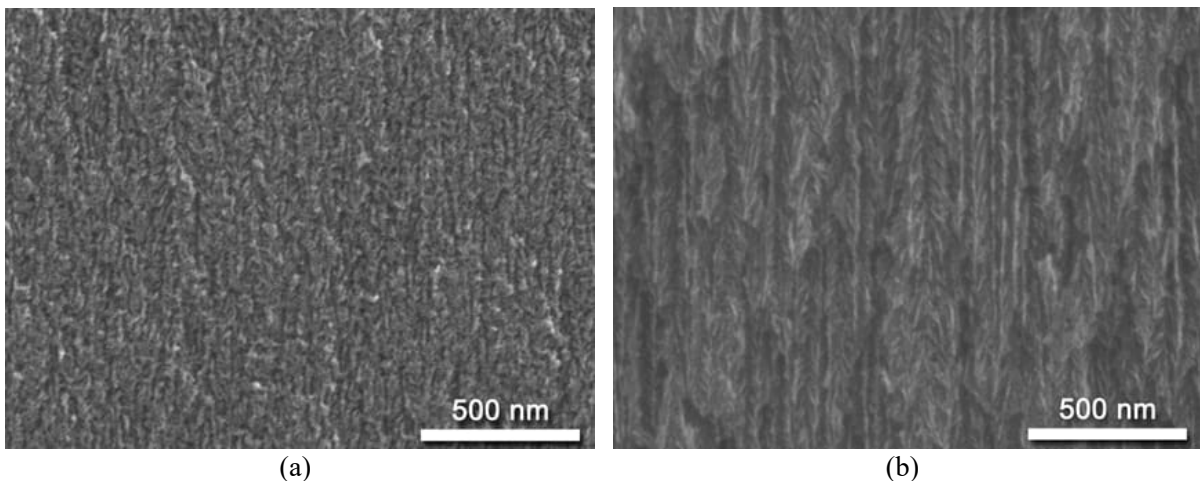

**Figure S2.** Cross-sectional SEM image of porous Si layer of (a) sample with low porosity ( $\approx 40\%$ ) and (b) high porosity ( $\approx 80\%$ ).

## 2. Porosity and hexadecane filling factor calculation

The reflectance spectra of porous Si layers were collected in the 1400–1700 nm wavelength range.

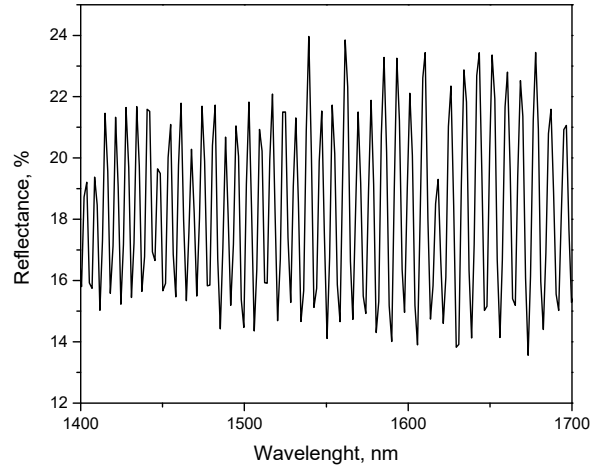

**Figure S3.** Reflectance IR spectrum of porous Si sample with 78,7% porosity.

### 2.1. Determination of refractive index of porous Si layer

For each interference maxima position (minima in reflectance scale), the following equation is satisfied:

$$N \cdot \lambda_{\max} = 2 \cdot d \cdot n_{\text{pSi}},$$

where,  $d$  and  $n_{\text{pSi}}$  are the thickness and the refractive index of the porous silicon layer respectively,  $\lambda_{\max}$  and  $N$  are the wavelength and an integer number of corresponding interference maximum respectively.

$n_{\text{pSi}}$  was estimated by using the following equation:

$$N_i - N_j = 2dn_{\text{pSi}} \left( \frac{1}{\lambda_{\max_i}} - \frac{1}{\lambda_{\max_j}} \right)$$

### 2.2. Porosity determination

The average effective refractive index of porous Si can be expressed as

$$n_{\text{pSi}}^{2/3} = f_{\text{Si}} n_{\text{Si}}^{2/3} + f_{\text{m}} n_{\text{m}}^{2/3},$$

where  $f_{\text{Si}}$  is the volume fraction occupied by nanocrystallites, and  $f_{\text{m}}$  – the medium (air or hexadecane) volume fraction. The condition  $\sum_i f_i = 1$  should be satisfied.

$f_{\text{air}}$  corresponds to the **porosity level** of porous Si.

From  $n_{\text{pSi}}^{2/3}$  the **hexadecane volume fraction**  $f_{\text{hex}}$  was estimated.

The **hexadecane filling factor** (%) was calculated as a ratio between  $f_{\text{hex}}$  and  $f_{\text{air}}$ .

In the present work,  $n_{\text{Si}} = 3.4$ ,  $n_{\text{air}} = 1$  and  $n_{\text{hex}} = 1.64$  were taken.

### 3. Local temperature measurements from Raman experiments

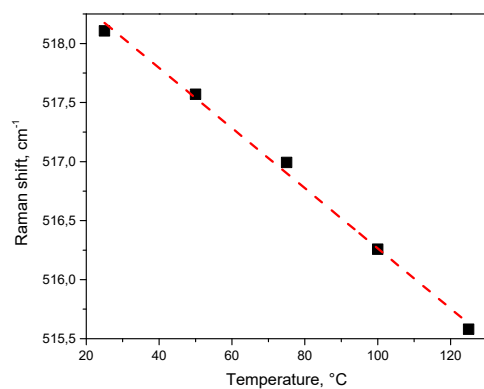

**Figure S4.** Correlation between Raman peak spectral position and sample temperature.
